# Supplementary material
Source: Springer Nature journal article supplement (https://www.springermedizin.de/resource/supplementary/12879_2011_1886_MOESM6_ESM.pdf/9443922)
Supplement: MOESM6 [file 9443922]

**Table 1 Host Factors and Urine LAM Status**

| Host Factors                                                 | Total<br>n=199 | LAM Negative<br>n=167 (83.9%) | LAM Positive*<br>n=32 (16.1%) | p-value**           |
|--------------------------------------------------------------|----------------|-------------------------------|-------------------------------|---------------------|
| <b>Median age years [IQR]</b>                                | 34 [28-43]     | 35 [30-40]                    | 34 [28-44]                    | 0.929 <sup>†</sup>  |
| <b>Gender</b>                                                |                |                               |                               | 0.904 <sup>††</sup> |
| Male                                                         | 110            | 92 (55.1)                     | 18 (56.3)                     |                     |
| Female                                                       | 89             | 75 (44.9)                     | 14 (43.8)                     |                     |
| <b>Patient TB category</b>                                   |                |                               |                               | 0.968 <sup>††</sup> |
| New TB case                                                  | 125            | 105 (62.9)                    | 20 (62.5)                     |                     |
| Re-treatment TB case                                         | 74             | 62 (37.1)                     | 12 (37.5)                     |                     |
| <b>Site of disease</b>                                       |                |                               |                               | 0.613 <sup>‡</sup>  |
| Pulmonary                                                    | 168            | 141 (84.4)                    | 27 (84.4)                     |                     |
| Extra-Pulmonary                                              | 18             | 16 (9.6)                      | 2 (6.3)                       |                     |
| Pulmonary and Extra-Pulmonary                                | 13             | 10 (6)                        | 3 (9.4)                       |                     |
| <b>Smear or culture positive</b>                             |                |                               |                               | <0.001 <sup>‡</sup> |
| Positive                                                     | 119            | 90 (53.9)                     | 29 (90.6)                     |                     |
| Negative                                                     | 79             | 76 (45.5)                     | 3 (9.4)                       |                     |
| Not done                                                     | 1              | 1 (0.6)                       | 0 (0)                         |                     |
| <b>HIV status</b>                                            |                |                               |                               | 0.002 <sup>‡</sup>  |
| Positive                                                     | 146            | 117 (70.1)                    | 29 (90.6)                     |                     |
| Negative                                                     | 52             | 50 (29.9)                     | 2 (6.3)                       |                     |
| Unknown                                                      | 1              | 0 (0)                         | 1 (3.1)                       |                     |
| <b>Median CD4 cells/<math>\mu</math>L. [IQR]<sup>a</sup></b> | 132.5 [70-283] | 156 [80-309]                  | 95 [42-134]                   | 0.006 <sup>†</sup>  |
| <50                                                          | 26             | 17 (14.5)                     | 9 (31)                        |                     |
| 50-99                                                        | 28             | 22 (18.8)                     | 6 (20.7)                      |                     |
| 100-199                                                      | 39             | 31 (26.5)                     | 8 (27.6)                      |                     |
| $\geq$ 200                                                   | 53             | 47 (40.2)                     | 6 (20.7)                      |                     |
| <b>ART at start of TB treatment<sup>a</sup></b>              |                |                               |                               | 0.078 <sup>††</sup> |
| Yes                                                          | 33             | 30 (25.6)                     | 3 (10.3)                      |                     |
| No                                                           | 113            | 87 (74.4)                     | 26 (89.7)                     |                     |
